# Supplementary material
Source: HighWire-hosted journal article supplement (https://openres.ersjournals.com/content/9/3/00039-2023)
Supplement: inline-supplementary-material-1 [file inline-supplementary-material-1.pdf]

**Supplementary Table 1. Cough characteristics**

| Subject | Frequency of cough                                                                                                                                                                                                                                                                             | Diurnal pattern                                                                                                                                                                                                                            | Variability in cough                                                                                                                                                                                                                                                                                                                                                                                                                           | Mucus production                                                                                                                                                                                                                                                                                                                                                                                                                                                                                                                                                                                                                                                                                                 | Duration                                                                                |
|---------|------------------------------------------------------------------------------------------------------------------------------------------------------------------------------------------------------------------------------------------------------------------------------------------------|--------------------------------------------------------------------------------------------------------------------------------------------------------------------------------------------------------------------------------------------|------------------------------------------------------------------------------------------------------------------------------------------------------------------------------------------------------------------------------------------------------------------------------------------------------------------------------------------------------------------------------------------------------------------------------------------------|------------------------------------------------------------------------------------------------------------------------------------------------------------------------------------------------------------------------------------------------------------------------------------------------------------------------------------------------------------------------------------------------------------------------------------------------------------------------------------------------------------------------------------------------------------------------------------------------------------------------------------------------------------------------------------------------------------------|-----------------------------------------------------------------------------------------|
| P1      | Daily...                                                                                                                                                                                                                                                                                       | Often at night.                                                                                                                                                                                                                            | Some days are worse than others.                                                                                                                                                                                                                                                                                                                                                                                                               | ... it's a dry cough. I never cough up phlegm.                                                                                                                                                                                                                                                                                                                                                                                                                                                                                                                                                                                                                                                                   | ... generally its fairly short.                                                         |
| P2      | <p>It's you know cough cough, cough. Through the day well probably you know you are coughing all day.</p> <p>As I say it's not too bad, you know I might cough 20-30 times an hour.</p> <p>Oh, that's when it's not too bad. It's usually a single or a double cough. Something like that.</p> | <p>... first thing in the morning of course.</p> <p>It's when I first start moving.</p> <p>... on a normal day it's, it's not too bad and then of course in the evening when the cooler weather comes down it gets a bit more heavier.</p> | <p>... sometimes it's not too bad and other times it can be quite...you know... debilitating.</p> <p>It can be a breathless cough. It can be sort of a dry cough... sometimes it's repetitious...one after another. Other times it's general oomph and that's it, it's gone.</p> <p>... it only needs one glass of beer or wine... and it just depends... some days it doesn't affect you and other days it does. It's just unpredictable.</p> | <p>It's like cleaning out the old pipes... bringing up a lot of gunk ...</p> <p>It can be sort of a dry cough.</p>                                                                                                                                                                                                                                                                                                                                                                                                                                                                                                                                                                                               | Luckily it usually subsides within about 15 minutes to half an hour... from getting up. |
| P3      | I have every day.                                                                                                                                                                                                                                                                              | <p>... mainly in the morning when you get up.</p> <p>First thing in the morning this tough battle... that I have to cough.</p> <p>I don't cough at night. I don't cough at night at all. That's the blessing that I have so far.</p>       | <p>I have good days and bad days. Good days will be maybe nothing and other days will be three or four attacks...</p> <p>You see sometimes when I sit down and do nothing it's good. But sometimes, when I am sitting down and doing nothing, the cough still comes sometimes because I've got sputum on my chest wanting to come out.</p>                                                                                                     | <p>But my cough is not really dry cough... I have a lot of mucous and sputum and every time I cough up, I cough up the sputum and then I have the mucous in my nose as well at the same time.</p> <p>... the cough almost 100% related to the sputum. It's not a dry cough.</p> <p>Usually chronic coughing with a lot... a lot of mucous, sputum, I couldn't get rid of. Too much to get rid of.</p> <p>... my coughing is very much associated with my sputum in my system. I don't have a dry cough. Every time I cough it's because I've got something in my chest.</p> <p>But any time I cough will be associated with sputum from my lungs wanting to come up. Very strange... I don't have dry cough.</p> | Maybe 10 minutes or so first action of my sputum...                                     |

|    |                        |                                                                                                                                                  |                                                                                                                                                                                                                                                                                                                                                                                 |                                                                                                                                                                                                                                                                                                                                                                                                                  |   |
|----|------------------------|--------------------------------------------------------------------------------------------------------------------------------------------------|---------------------------------------------------------------------------------------------------------------------------------------------------------------------------------------------------------------------------------------------------------------------------------------------------------------------------------------------------------------------------------|------------------------------------------------------------------------------------------------------------------------------------------------------------------------------------------------------------------------------------------------------------------------------------------------------------------------------------------------------------------------------------------------------------------|---|
| P4 | ... it's always there. | It's usually that early morning movement... the making of the bed... like getting dressed... making the bed... I'm done.                         | It really knocks the socks off me some mornings and other times I can sort of work around it.                                                                                                                                                                                                                                                                                   | -                                                                                                                                                                                                                                                                                                                                                                                                                | - |
| P5 | -                      | -                                                                                                                                                | Some of the time it just goes on and on and on. It's been alright the last few days. Probably the last week. I haven't had too much of it.                                                                                                                                                                                                                                      | -                                                                                                                                                                                                                                                                                                                                                                                                                | - |
| P6 | Intermittent...        | -                                                                                                                                                | ... sometimes I can be reading and all of a sudden I will get a cough and it's strange. It can go for a while and all of a sudden... I can go for three weeks and then all of a sudden I can start coughing more regularly...<br><br>It's annoying when I get to have a real coughing fit. And that's few and far in between... But on the daily thing it's not too bad really. | ...what I usually get is a dry cough.                                                                                                                                                                                                                                                                                                                                                                            | - |
| P7 | -                      | But I don't wake up during the night with cough so...                                                                                            | Well it varies day to day. Like in the morning to the afternoon, depending on what I am doing and it depends on the weather. Whether it's windy or not...<br><br>Every day is just different. Not two days are the same...                                                                                                                                                      | -                                                                                                                                                                                                                                                                                                                                                                                                                | - |
| P8 | -                      | At night though it gets quite tense. More so at night than through the day. Occasionally through the day but again it doesn't interrupt my life. | -                                                                                                                                                                                                                                                                                                                                                                               | ...the cough itself is no longer dry...before it was dry...now at night you feel phlegm and quite often I get.<br><br>What can I do? It just comes up. I can't even cough it up. It just comes up. Whatever comes up I can take out with a tissue and anything else has to go back down. Because I am not going to sit here and cough my lungs up to try and get the phlegm up. Things to do and places to go... | - |

|     |                                                                                                                                                                                                                                                                                                                                                         |                                                                                                                                                                                                                                                                                                                                                                                               |                        |                                                                                                                                                                       |   |
|-----|---------------------------------------------------------------------------------------------------------------------------------------------------------------------------------------------------------------------------------------------------------------------------------------------------------------------------------------------------------|-----------------------------------------------------------------------------------------------------------------------------------------------------------------------------------------------------------------------------------------------------------------------------------------------------------------------------------------------------------------------------------------------|------------------------|-----------------------------------------------------------------------------------------------------------------------------------------------------------------------|---|
| P9  | I cough...there hasn't been one day that goes by that I haven't coughed.                                                                                                                                                                                                                                                                                | <p>... at night especially when I lay down on the pillow....it may be compressing more I'm not sure...</p> <p>Every night... when I lay down I cough every night in my sleep. I cough a lot.</p> <p>I cough every night. There is no way to explain it. I just cough every night. It doesn't matter whether I've had a good day, bad day or otherwise I still tend to cough all the time.</p> | -                      | I put my fingers under my ribcage, and I push up and feel a lot of congestion comes up out of my chest.                                                               | - |
| P10 | Lately it's becoming more frequent. I have a coughing episode more often... it never used to be as frequent as it is now... I guess the cadence...it's very hard to explain how many times but it might be... say half a dozen times where I clear my throat and have a little cough... and now it might be more like 30 times a day. It might be more. | -                                                                                                                                                                                                                                                                                                                                                                                             | ... it can vary a lot. | I think it's the production of the phlegm has increased too.                                                                                                          | - |
| P11 | -                                                                                                                                                                                                                                                                                                                                                       | ... only a lot of coughing in the morning and the evening.                                                                                                                                                                                                                                                                                                                                    | -                      | <p>... chesty and mucousy.</p> <p>Chesty, mucousy... when it's regular life... every day it might just be one random cough. Two random coughs. Say every 2 hours.</p> | - |
| P12 | <p>... it seems to come and go...</p> <p>I won't be able to put a time or frequency on it because it is not regular enough.</p>                                                                                                                                                                                                                         | -                                                                                                                                                                                                                                                                                                                                                                                             | -                      | ... we are talking about a wet cough, not a dry cough.                                                                                                                | - |

|     |                                                                                                   |                                                                                                                                                                                                                                                                                     |                                                                                                                                                                                                                                                                                                                                                                                                                      |                                                                                                                                                                                                                                                                                                                                                                                                     |   |
|-----|---------------------------------------------------------------------------------------------------|-------------------------------------------------------------------------------------------------------------------------------------------------------------------------------------------------------------------------------------------------------------------------------------|----------------------------------------------------------------------------------------------------------------------------------------------------------------------------------------------------------------------------------------------------------------------------------------------------------------------------------------------------------------------------------------------------------------------|-----------------------------------------------------------------------------------------------------------------------------------------------------------------------------------------------------------------------------------------------------------------------------------------------------------------------------------------------------------------------------------------------------|---|
| P13 | -                                                                                                 | <p>Although recent times I've been coughing in the morning. A dry cough in the morning. When I wake up.</p> <p>Other than those instances I don't cough all day long. I get a good night's sleep. I don't cough through the night.</p> <p>I'm starting to cough in the morning.</p> | <p>It has varied over the years.</p> <p>... you go through these phases I find. You have good and bad patches.</p>                                                                                                                                                                                                                                                                                                   | <p>A dry cough in the morning.</p> <p>And I think I'm producing more mucous. Sinus mucous and phlegm on my chest. About 3 weeks or a month... when I make up in the morning I've just got to clear it. Once I cough for a bit and clear it I am alright and I don't cough for the rest of the day.</p> <p>And I started to have excess mucous and phlegm.</p>                                       | - |
| P14 | <p>... it does affect me in the day...</p> <p>I usually have like 2 sessions a day (cough)...</p> | I get it in the day as well as the night.                                                                                                                                                                                                                                           | <p>...some days could be a little bit more... harder than other days... and other days I just have a cough for a short period of time.</p> <p>... when I finally go off to sleep... I'm just... a normal light sleep and get up in the morning. It will settle down a little bit. Some nights are different to other nights... once I've took the mixture... I'll settle down after a while and go off to sleep.</p> | I get dry cough... and it doesn't want to go away.                                                                                                                                                                                                                                                                                                                                                  | - |
| P15 | <p>... but there's a cough... every day I cough.</p>                                              | -                                                                                                                                                                                                                                                                                   | <p>There aren't really days where the cough is worse. No... even when I had the infection, that didn't affect the cough. It was my breathing.</p>                                                                                                                                                                                                                                                                    | <p>... it feels like I'm clearing...an airway...and I have phlegm... I cough phlegm... each time I always cough phlegm.</p>                                                                                                                                                                                                                                                                         | - |
| P16 | -                                                                                                 | <p>In the morning... it never happens in the morning... it never happens during the day. It's anywhere from four thirty onwards. Till about eight o'clock. Sometimes it can happen after dinner.</p>                                                                                | It has sort of evolved and it changes.                                                                                                                                                                                                                                                                                                                                                                               | <p>And I said look I feel like I need to get the productive stuff off my chest... I feel that in the mornings... that's when I would usually feel that. And I've got to clear the cough... Sometimes I can get into a coughing fit to the point where I have to get up whatever mucous might be there... and then I end up throwing up to clear it and then that clears that cough for a while.</p> | - |
